# Supplementary figures and images for: Valproic acid protects against haemorrhagic shock‐induced signalling changes via PPARγ activation in an in vitro model
Source: PubMed Central journal article supplement — Br J Pharmacol. 2015 Oct 22;172(22):5306–17. doi: 10.1111/bph.13320 (PMC5123713; doi:10.1111/bph.13320), 2015-10-22

**A**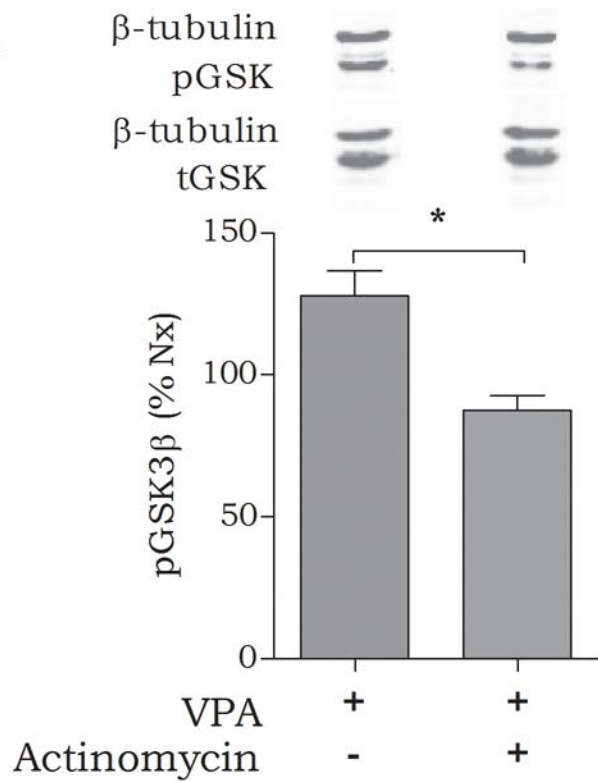**B**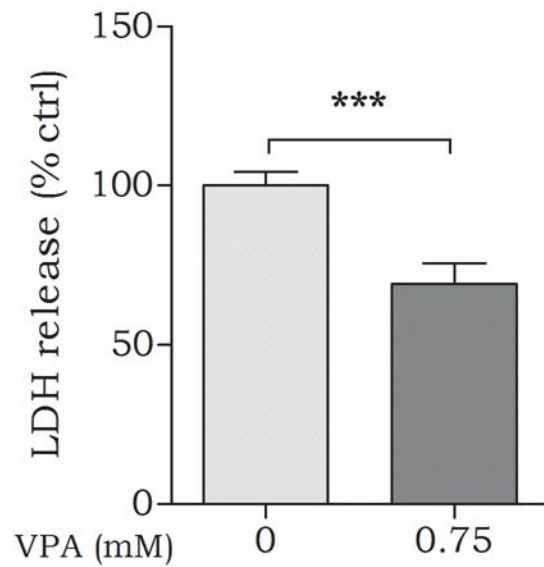

Supplement: BPH-172-5306-s002.pdf [file BPH-172-5306-s002.pdf]
